# Supplementary material for: Exosomal microRNA miR-1246 induces cell motility and invasion through the regulation of DENND2D in oral squamous cell carcinoma
Source: PubMed Central journal article supplement (PMC5144099; doi:10.1038/srep38750), 2016-12-08

**Submission to *Scientific Reports***

**Exosomal microRNA, *miR-1246*, induces cell motility and invasion through the regulation of *DENND2D* in oral squamous cell carcinoma**

Sujata Sakha D.D.S.<sup>1</sup>, Tomoki Muramatsu, Ph.D.<sup>1</sup>, Koji Ueda, Ph.D.<sup>3</sup>, and Johji Inazawa, M.D., Ph.D.<sup>1,2</sup>

<sup>1</sup>Department of Molecular Cytogenetics, Medical Research Institute, Tokyo Medical and Dental University, Tokyo, Japan. <sup>2</sup>Bioresource Research Center, Tokyo Medical and Dental University, Tokyo, Japan. <sup>3</sup>Project for Personalized Cancer Medicine, Genome Center, Japanese Foundation for Cancer Research, Tokyo, Japan

**Supplementary Information**

Supplementary Figure S1. Analysis of RNA from cells and exosomes isolated by the size-exclusion chromatography method using an Agilent Bioanalyzer.

Supplementary Figure S2. LM-exosomes do not affect the cell growth, migration and invasion abilities of HOC313-LM cells.

Supplementary Figure S3. Extraction of candidate miRNAs as oncomiRs.

Supplementary Figure S4. *MiR-1246* promotes cell migration and invasion through the regulation of *DENND2D* in TSU cells.

Supplementary Figure S5. *MiR-1246* promotes cell migration and invasion through the regulation of *DENND2D* in HeLa cells

Supplementary Figure S6. Analysis of RNA from LM-exosomes isolated by ultracentrifugation and by an exosome isolation kit using an Agilent Bioanalyzer.

**HOC313-P exosome**

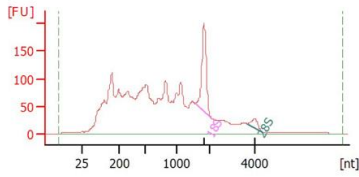

RNA Concentration: 16,237 pg/ $\mu$ l  
rRNA Ratio [28s / 18s]: 0.1

**LM-exosome**

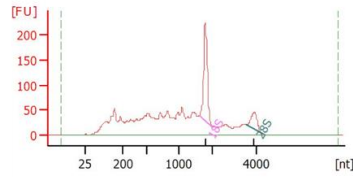

RNA Concentration: 9,486 pg/ $\mu$ l  
rRNA Ratio [28s / 18s]: 0.2

**HOC313-P whole cell RNA**

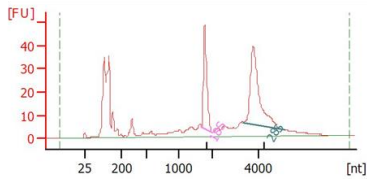

RNA Concentration: 3,067 pg/ $\mu$ l  
rRNA Ratio [28s / 18s]: 1.7

**LM whole cell RNA**

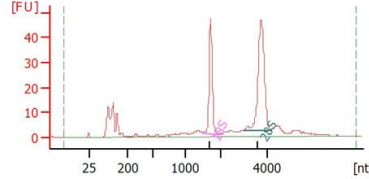

RNA Concentration: 1,238 pg/ $\mu$ l  
rRNA Ratio [28s / 18s]: 1.7

**Negative control (water)**

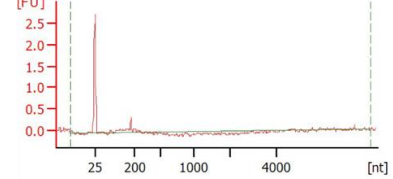

RNA Concentration: 7 pg/ $\mu$ l  
rRNA Ratio [28s / 18s]: 0.0

**Supplementary Figure S1. Analysis of RNA from cells and exosomes isolated by the size-exclusion chromatography method using an Agilent Bioanalyzer.**

Total RNA was isolated from whole cells and exosomes in the both of HOC313-P and -LM cells and RNA quality was analyzed by Agilent 2100 Bioanalyzer. The 18S and 28S rRNA were dominant peaks in RNA from whole cells. nt: nucleotide length. FU: fluorescent units.

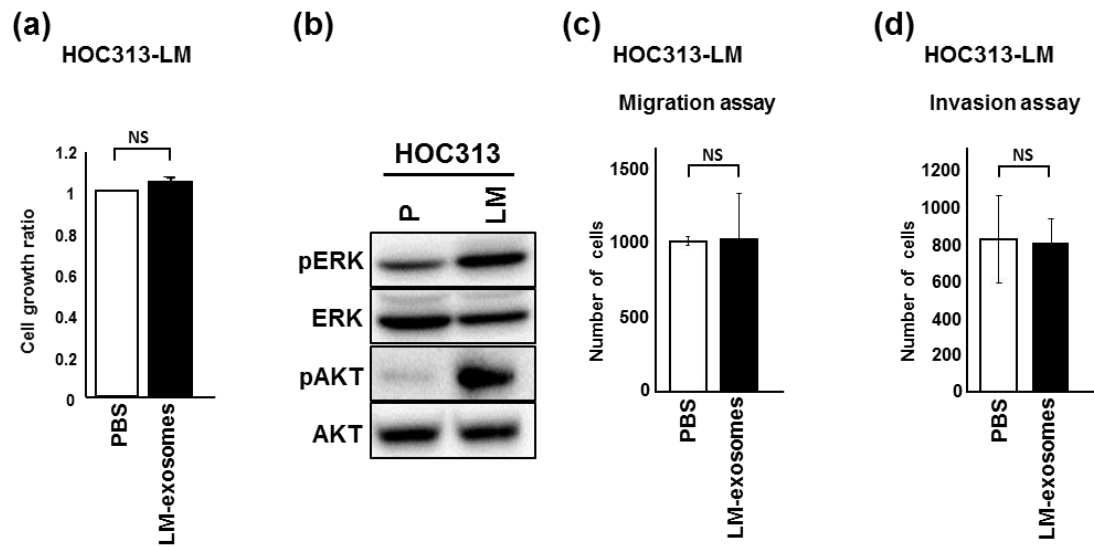

**Supplementary Figure S2. LM-exosomes do not affect the cell growth, migration and invasion abilities of HOC313-LM cells.**

(a) The effect of LM-exosomes on cell proliferation of HOC313-LM was determined by WST-8 assay after incubation with PBS or LM-exosomes for 5 days. The growth was not affected. (b) Western blotting analysis of ERK and AKT and their phosphorylation status were shown in HOC313-P and -LM cells. (c, d) Cell motility was assessed by transwell migration assay (c) and cell invasion by transwell invasion assay (d) after treatment of PBS or LM-exosomes in HOC313-LM cells. Experiments were repeated for three times. (Bars, SD). The student t-test was used for statistical analysis. NS: no significance.

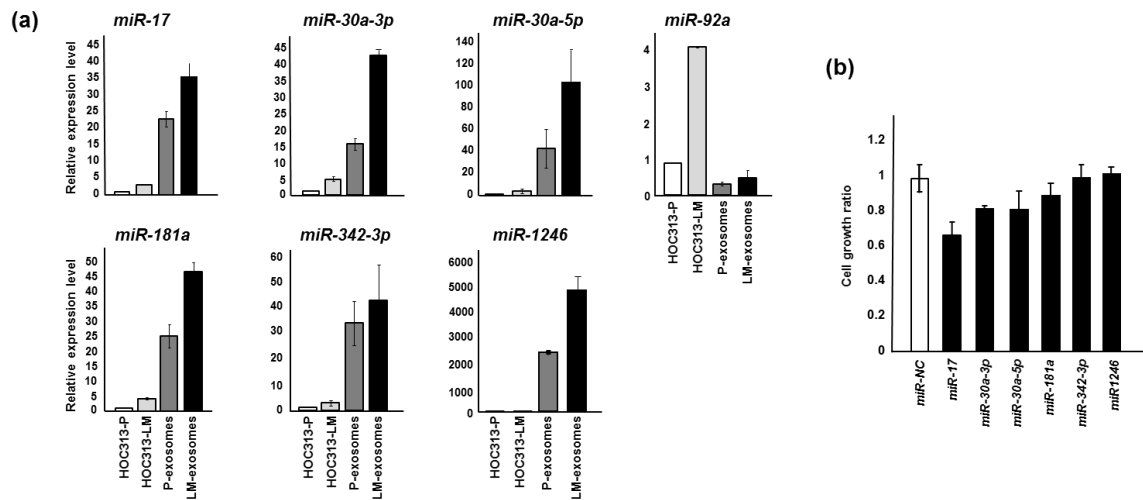

### Supplementary Figure S3. Extraction of candidate miRNAs as oncomiRs.

(a) Validation of candidate miRNA expression in HOC313-P and -LM cell as well as their respective exosomes was measured by qRT-PCR. Their expressions were normalized by *RNU6B* expression. The expression of *miR-92a* was not validated by qRT-PCR.

(b) The cell growth after five days of treatment with these miRNAs or negative control in HOC313-P cells was assessed by WST-8 assay. Each data point represents the mean of three experiments. (bars, SD).

TSU

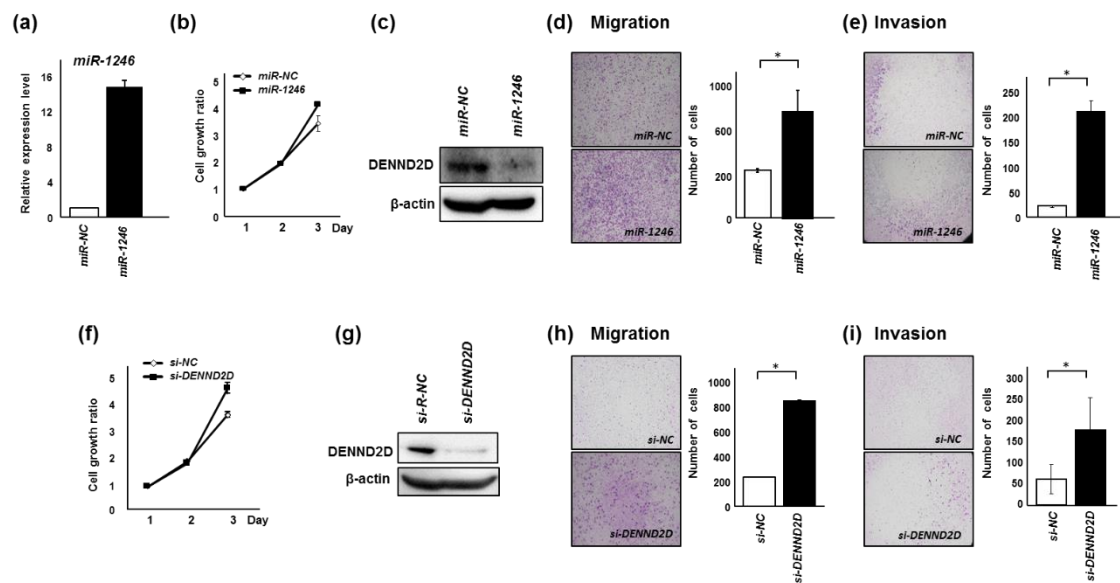

**Supplementary Fig. S4. *MiR-1246* promotes cell migration and invasion through the regulation of *DENND2D* in TSU cells.**

(a) Validation of *miR-1246* expression after miRNA transfection in TSU cells was measured by qRT-PCR. The expression of *miR-1246* was normalized by RNU6B expression. (b, f) The effect of *miR-1246* (b) or DENND2D-specific siRNA (f) on cell proliferation of TSU cells was evaluated by WST-8 assay. (c, g) Downregulation of DENND2D at the protein level was confirmed by western blot analysis after transfection of miR-1246 (c) or DENND2D-specific siRNA (g). (d-e, h-i) Cell migration was assessed by transwell migration assay (d, h) and cell invasion by transwell invasion assay (e, i) with *miR-1246* (d-e) or DENND2D-specific siRNA (h-i) transfection in TSU cells.

Experiments were performed in triplicate. (Bars, SD). The student *t*-test was used for statistical analysis; asterisks represent  $P < 0.05$  versus each control transfectant.

HeLa

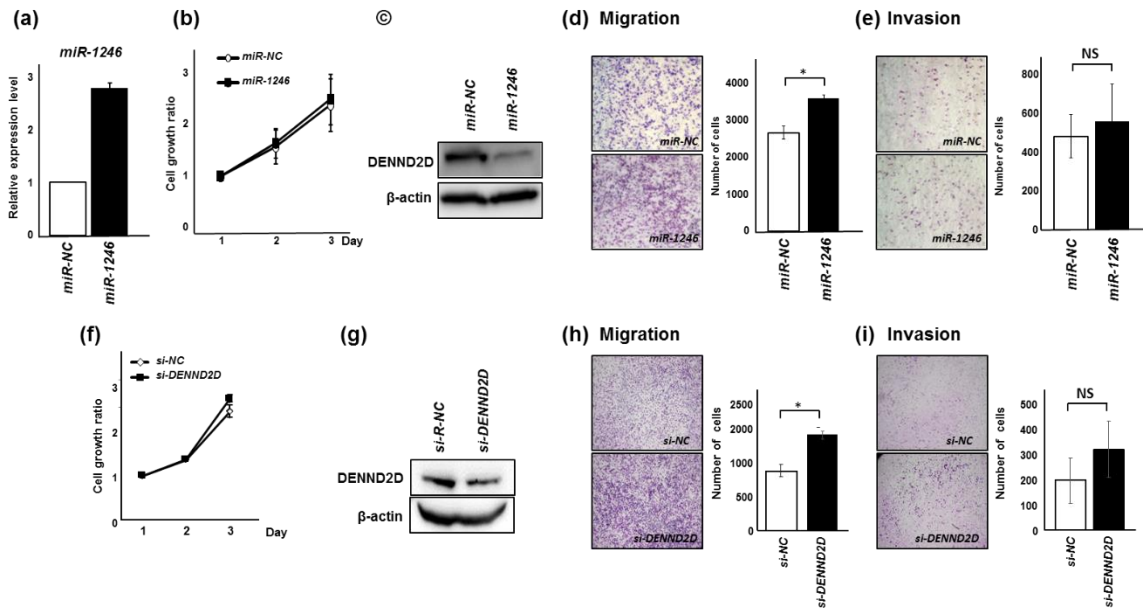

**Supplementary Fig. S5. *MiR-1246* promotes cell migration and invasion through the regulation of *DENND2D* in HeLa cells.**

(a) Validation of *miR-1246* expression after miRNA transfection in HeLa cells was measured by qRT-PCR. The expression of *miR-1246* was normalized by RNU6B expression. (b, f) The effect of *miR-1246* (b) or DENND2D-specific siRNA (f) on cell proliferation of HeLa cells was evaluated by WST-8 assay. (c, g) The expression of DENND2D was analyzed by western blotting analysis in HeLa cells after transfection with *miR-1246* or DENND2D-specific siRNA for 72 hours. (d-e, h-i) Cell migration was assessed by transwell migration assay (d, h) and cell invasion by transwell invasion assay (e, i) with *miR-1246* (d-e) or DENND2D-specific siRNA (h-i) transfection in HeLa

cells. Experiments were performed in triplicate. (Bars, SD). The student *t*-test was used for statistical analysis; asterisks represent  $P < 0.05$  versus each control transfectant.



## LM-exosomes RNA profile

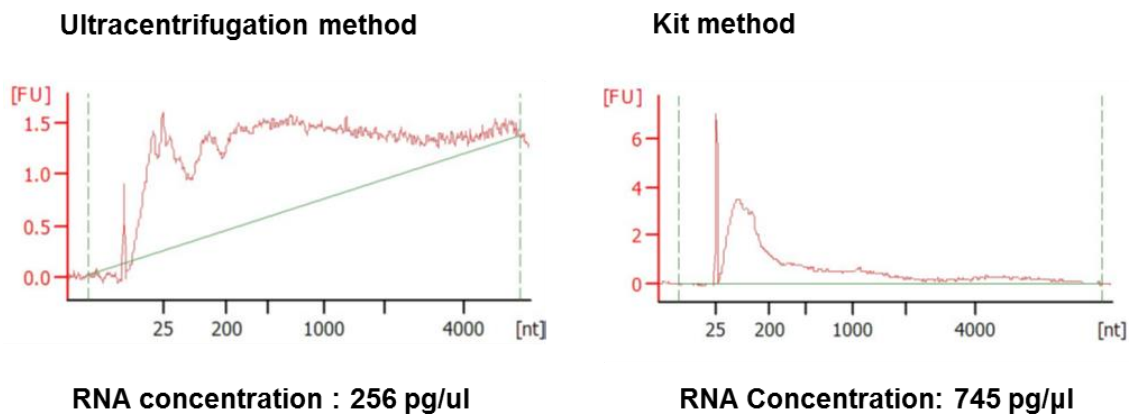

**Supplementary Figure S6. Analysis of RNA from LM-exosomes isolated by ultracentrifugation and by an exosome isolation kit using an Agilent Bioanalyzer.**

Total RNA was isolated from exosomes of HOC313-LM cells in ultracentrifugation and kit methods and RNA quality was analyzed by Agilent 2100 Bioanalyzer. nt: nucleotide length. FU: fluorescent units.

Figure 1b

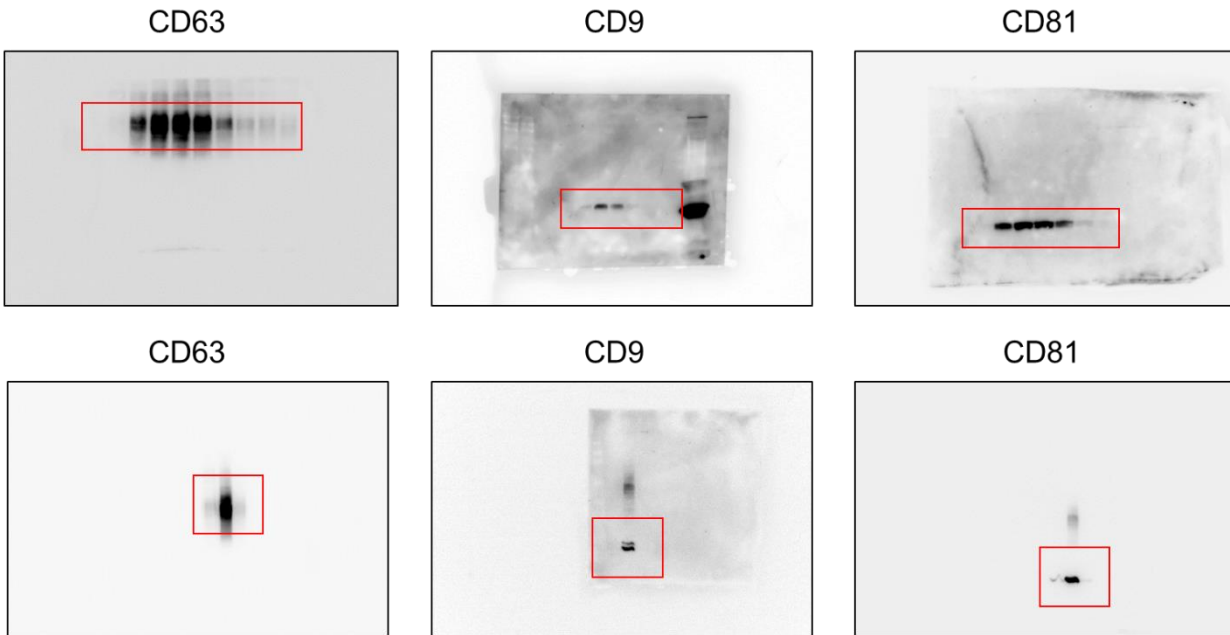

Figure 2b

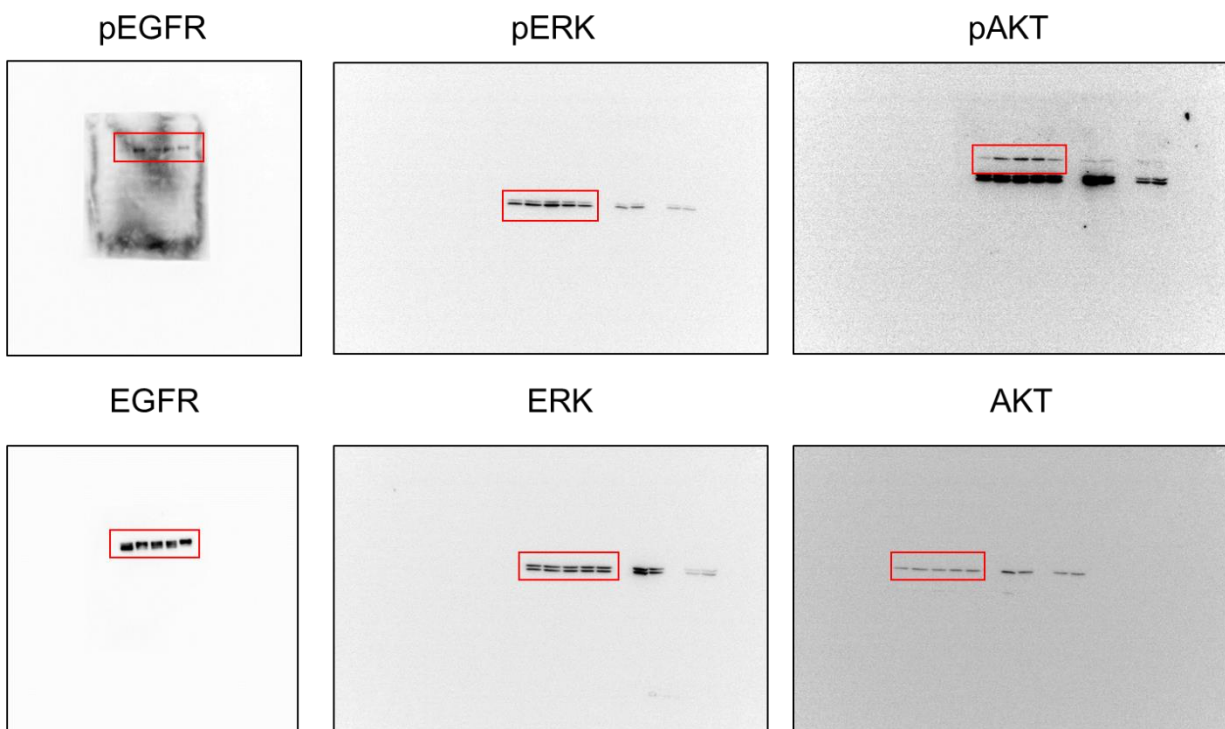

Figure 4b

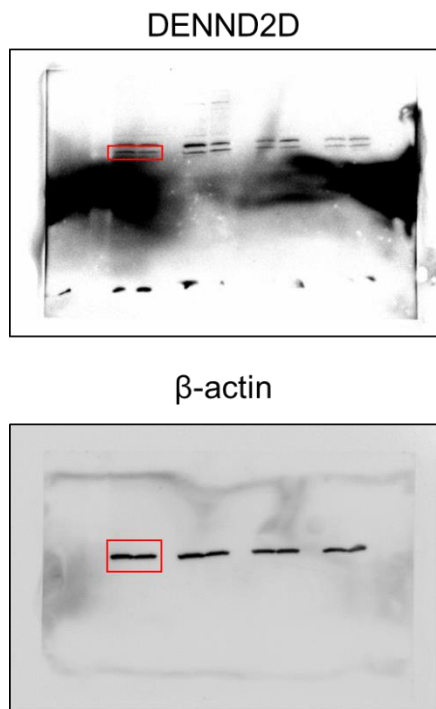

Figure 4c

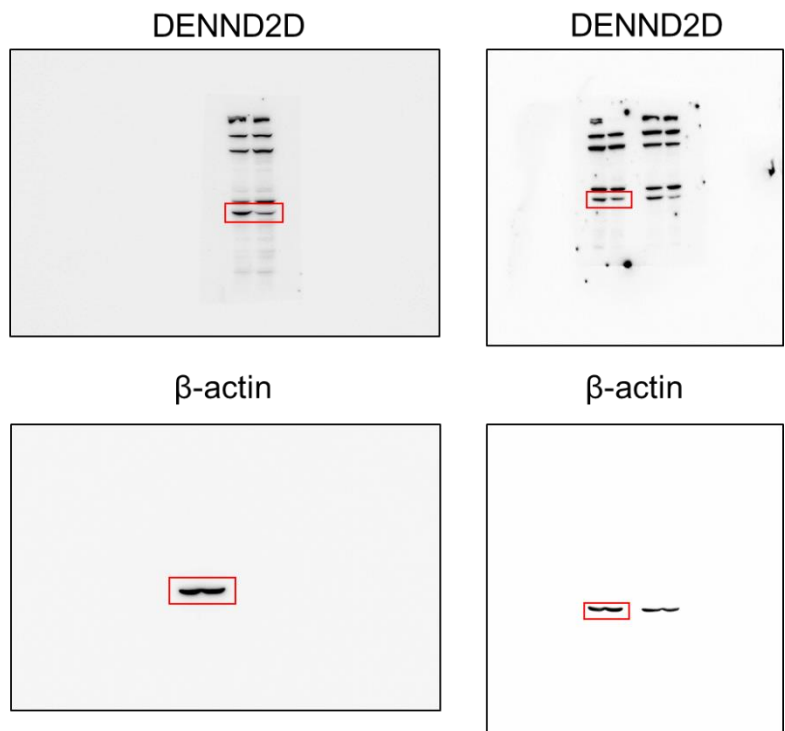

Supplementary Figure 2Sb

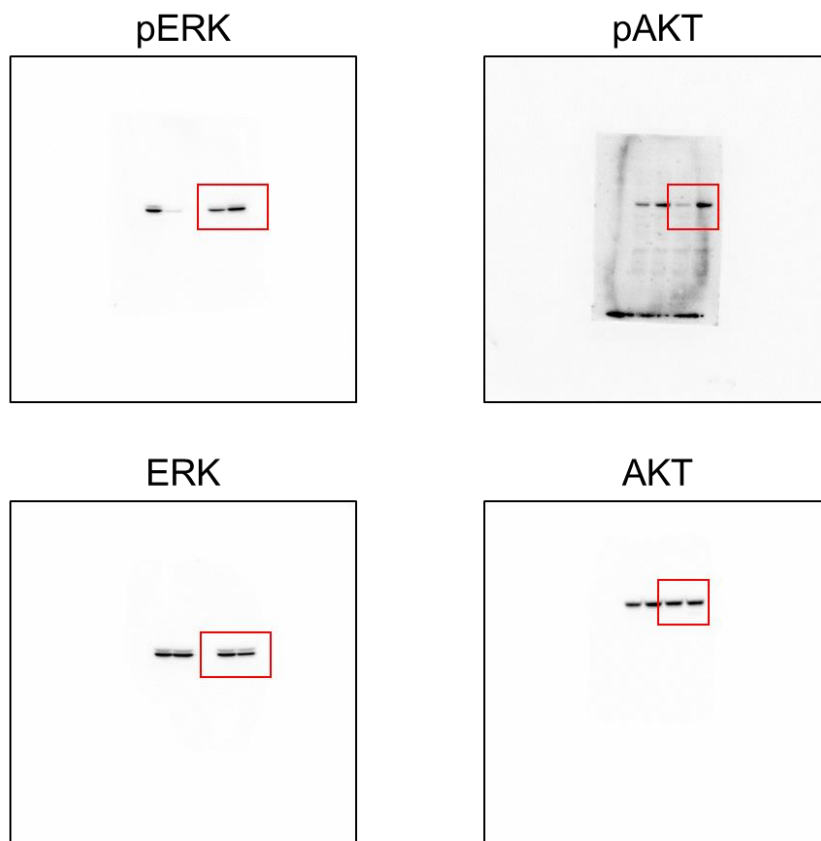

Supplementary Figure 4Se

DENND2D

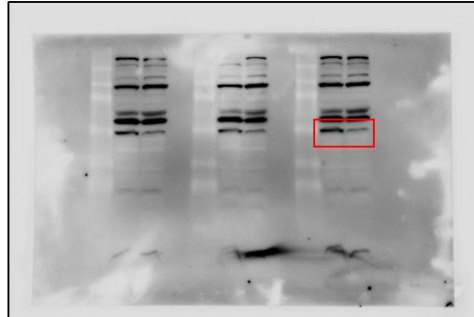

$\beta$ -actin

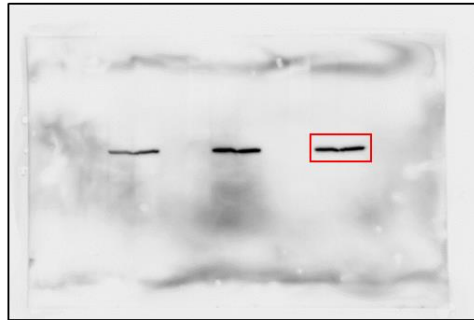

Supplement: srep38750-s1.pdf [file srep38750-s1.pdf]
